# Supplementary material for: Mother's Own Milk and Bronchopulmonary Dysplasia: A Systematic Review and Meta-Analysis
Source: PubMed Central journal article supplement (PMC6593284; doi:10.3389/fped.2019.00224), 2019-06-06
Supplement: Data_Sheet_1.pdf [file Data_Sheet_1.pdf]

## Supplementary Material

# Mother's Own Milk and Bronchopulmonary Dysplasia: A Systematic Review and Meta-Analysis

**Eduardo Villamor-Martínez<sup>1</sup>, Maria Pierro<sup>2</sup>, Giacomo Cavallaro<sup>3</sup>, Fabio Mosca<sup>3</sup>, Eduardo Villamor<sup>1\*</sup>**

<sup>1</sup> Department of Pediatrics, Maastricht University Medical Center (MUMC+), School for Oncology and Developmental Biology (GROW), Maastricht, The Netherlands

<sup>2</sup> UOC TIN e Neonatologia, Dipartimento Salute Mamma e Bambino, Fondazione Poliambulanza Brescia, Italy

<sup>3</sup> Neonatal Intensive Care Unit, Department of Clinical Sciences and Community Health, Fondazione IRCCS Cà Granda Ospedale Maggiore Policlinico, Università degli Studi di Milano, Milan, 20122, Italy

**\* Correspondence:**

Eduardo Villamor, MD PhD.  
e.villamor@mumc.nl

### 1 Supplementary Figures and Tables

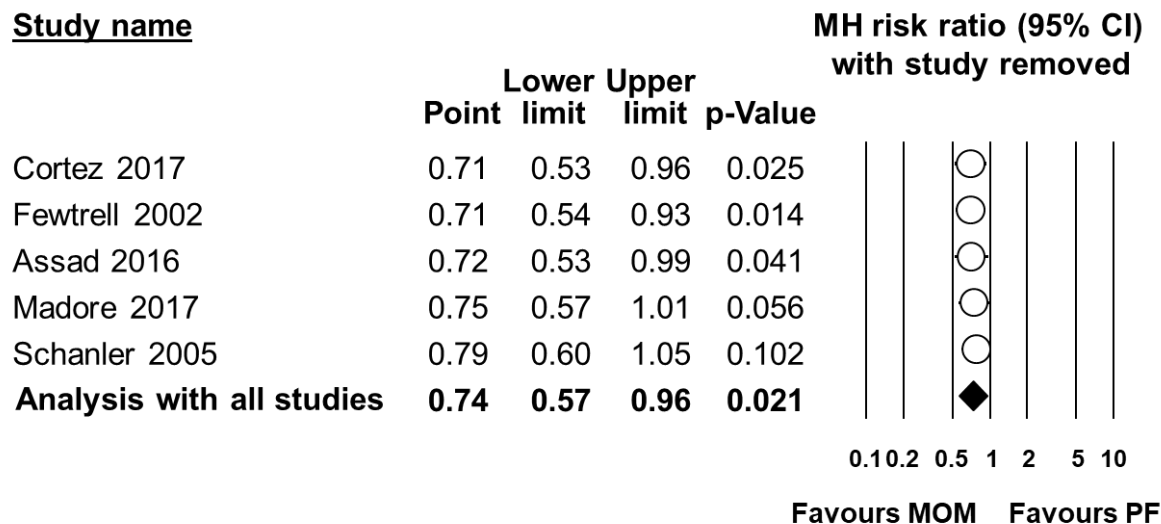

**Supplementary Figure 1.** Meta-analysis of Exclusive MOM vs. Any PF, effect of removing one study each time. MOM: mother's own milk; PF: preterm formula; MH: Mantel-Haenszel.

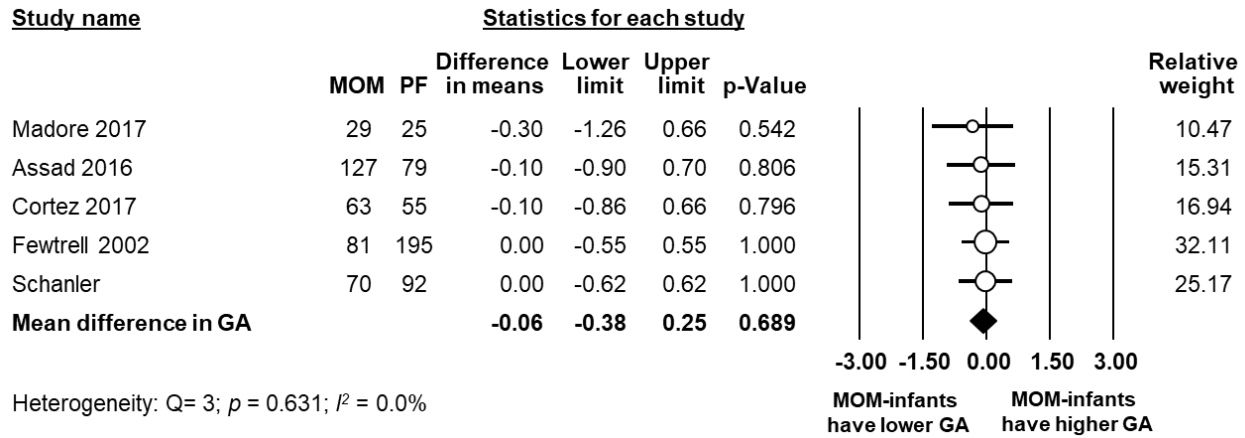

**Supplementary Figure 2.** Meta-analysis of Exclusive MOM vs. Any PF, mean difference (MD) in gestational age (GA) between groups. MOM: mother’s own milk; PF: preterm formula.

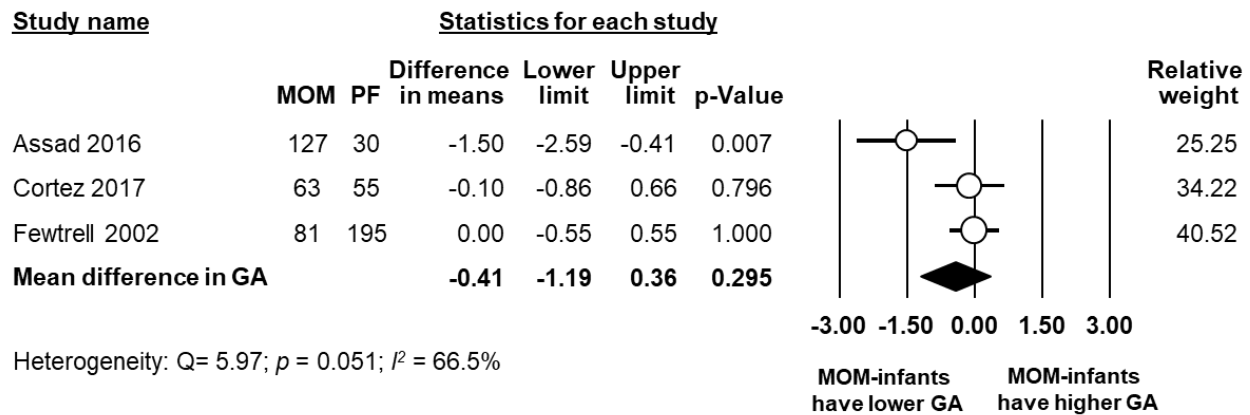

**Supplementary Figure 3.** Meta-analysis of Exclusive MOM vs. Exclusive PF, mean difference (MD) in gestational age (GA) between groups. MOM: mother’s own milk; PF: preterm formula.

**Study name**

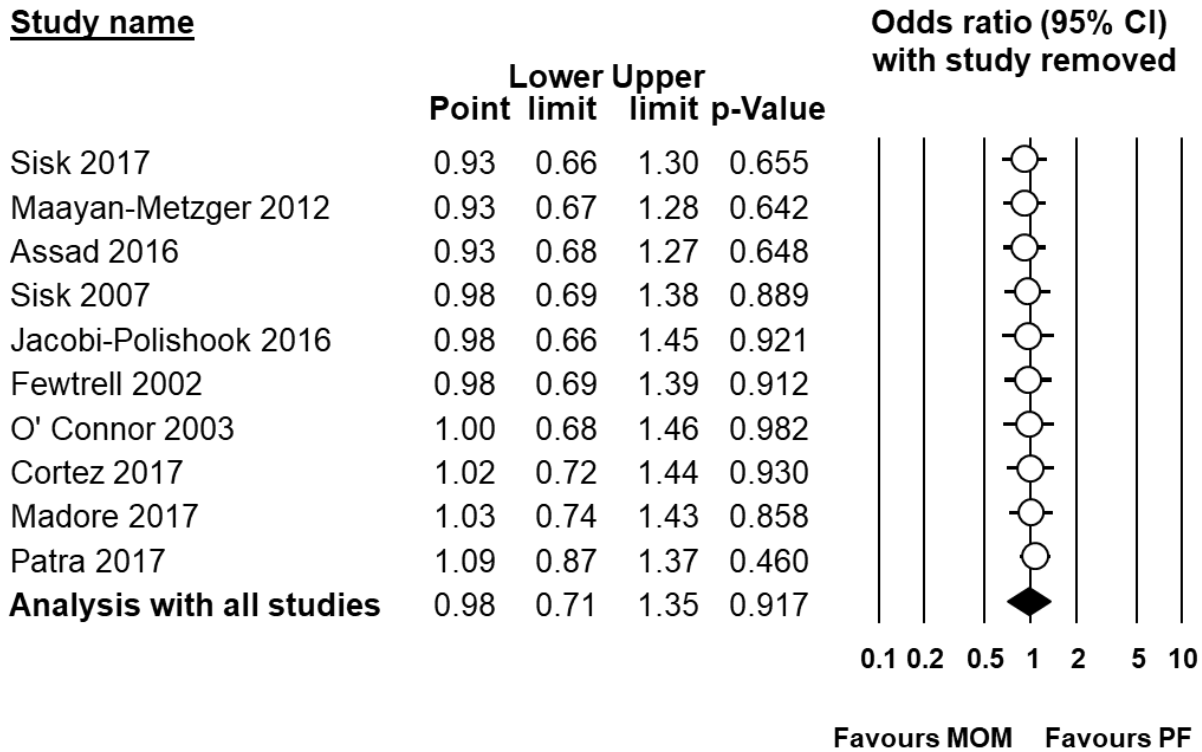

**Supplementary Figure 4.** Meta-analysis of Mainly MOM vs. Mainly PF, effect of removing one study each time. MOM: mother’s own milk; PF: preterm formula.

**Study name**

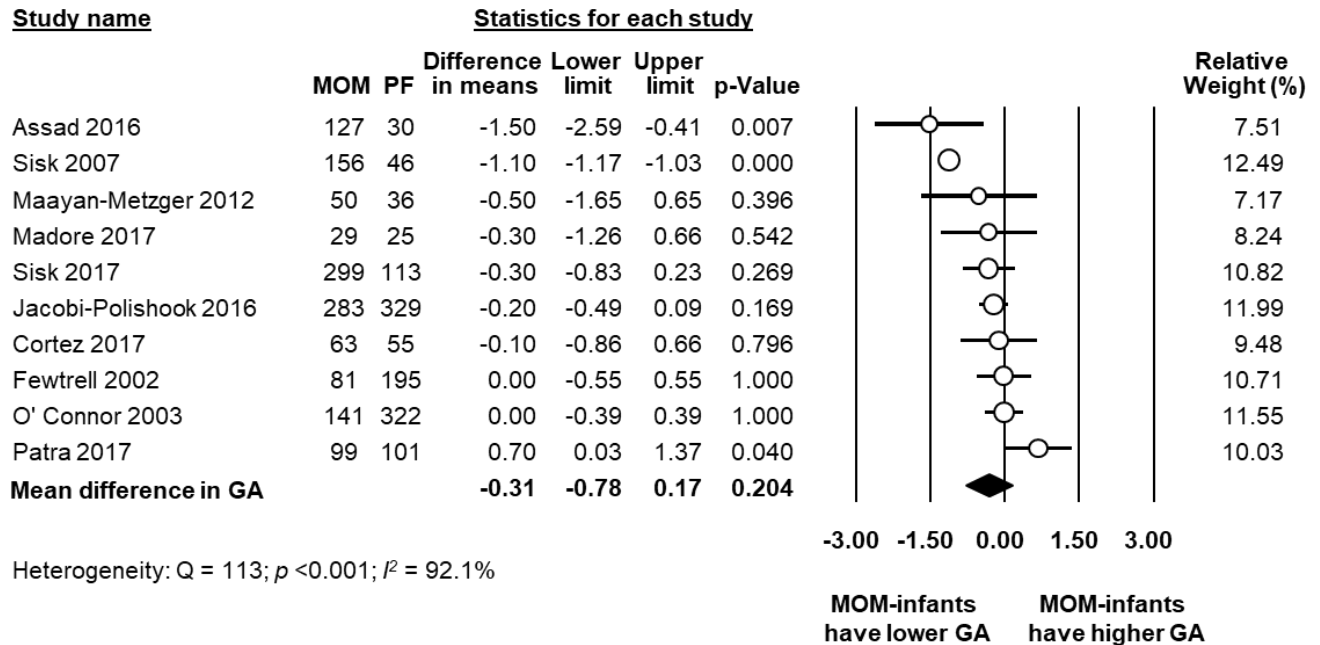

**Supplementary Figure 5.** Meta-analysis of Meta-analysis of Mainly MOM vs. Mainly PF, mean difference (MD) in gestational age (GA) between groups. MOM: mother’s own milk; PF; preterm formula.

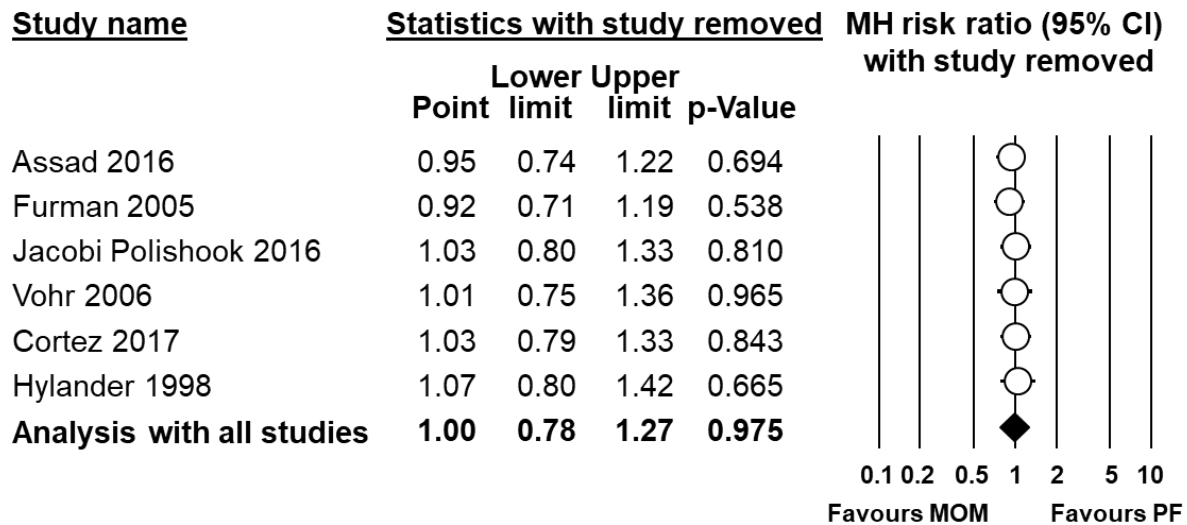

**Supplementary Figure 6.** Meta-analysis of Any MOM vs. Exclusive PF, effect of removing one study each time. MOM: mother’s own milk; PF: preterm formula.

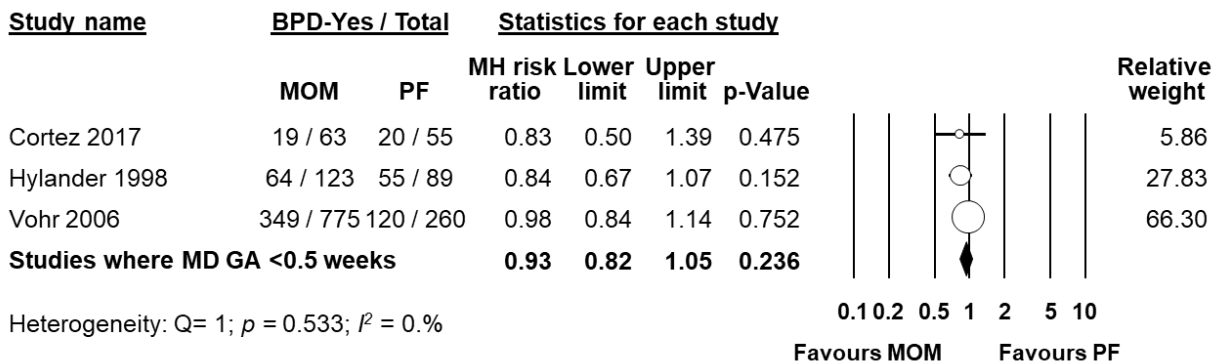

**Supplementary Figure 7.** Meta-analysis of Any MOM vs. Exclusive PF and risk of BPD, only including studies where the mean difference (MD) in gestational age (GA) was <0.50 weeks. MOM: mother’s own milk; PF: preterm formula; BPD: bronchopulmonary dysplasia; CI: confidence interval.

**A. Exclusive MOM vs. Any PF**
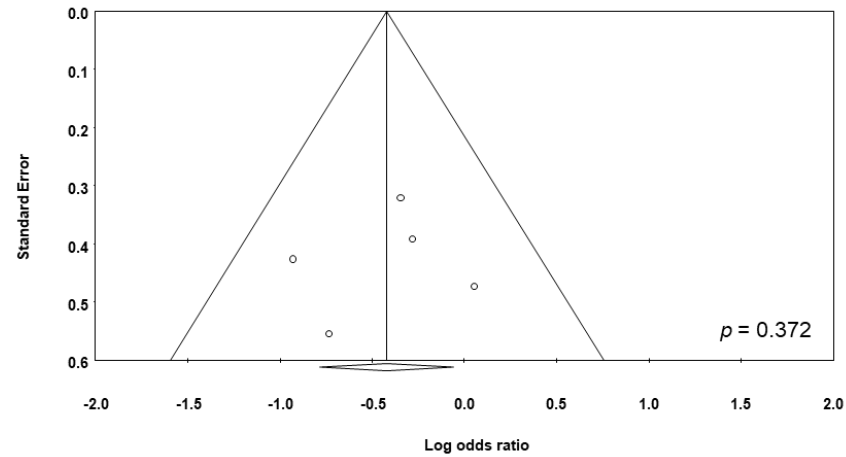
**B. Mainly MOM vs. Mainly PF**
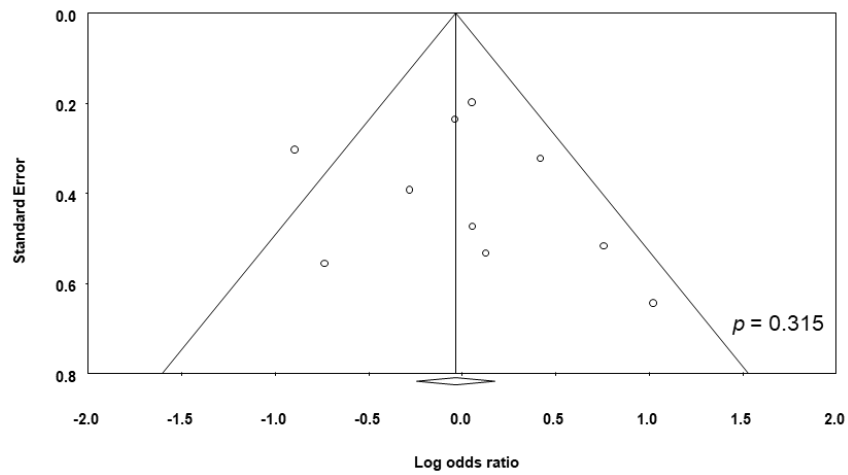
**C. Any MOM vs. Exclusive PF**
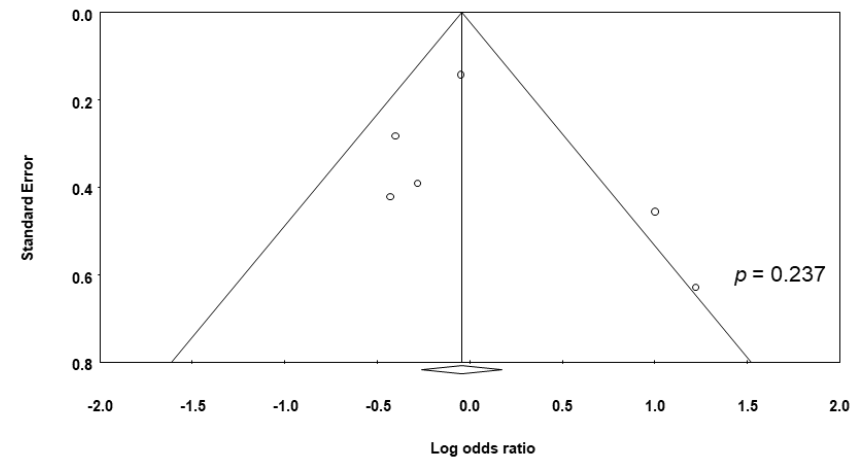

**Supplementary Figure 8.** Funnel plot analysis of publication bias. MOM: mother's own milk; PF: preterm formula.

**Supplementary Table 1.** Synoptic table of characteristics of all included studies.

| First author, year           | Location              | Study design                               | Primary outcome(s)                                                                                     | Respiratory outcome(s) | Groups                                                                                                              | Inclusion criteria            | Study duration             | Fortified                                                                | Patients (centers) | Comments                                                                                |
|------------------------------|-----------------------|--------------------------------------------|--------------------------------------------------------------------------------------------------------|------------------------|---------------------------------------------------------------------------------------------------------------------|-------------------------------|----------------------------|--------------------------------------------------------------------------|--------------------|-----------------------------------------------------------------------------------------|
| Assad et al. 2016            | Baltimore, MD, USA    | Retrospective cohort                       | Feeding intolerance, time to full feeds, NEC, length of stay, weight gain, cost of hospitalization     | BPD36                  | - MOM + DHM + DHM-based fortifier;<br>- MOM + bovine fortifier;<br>- MOM + bovine fortifier + PF;<br>- Exclusive PF | GA <29 weeks and/or BW ≤1500g | Until discharge            | DHM fortifier in exclusive human diet, bovine fortifier in bovine groups | 293 (1)            |                                                                                         |
| Cortez et al. 2017           | Jacksonville, FL, USA | Prospective cohort                         | NEC, infection                                                                                         | BPD36                  | - Received >95% MOM<br>- Received >95% PF                                                                           | GA <33 weeks                  | 36h of age until discharge | Bovine fortifier added to MOM                                            | 118 (3)            |                                                                                         |
| Fewtrell et al. 2002         | London, UK            | RCT (for our exposure: prospective cohort) | MDI and PDI at 18 months, Passamanick and Sherrard's Developmental Screening Inventory at 9 months PMA | BPD28                  | - Exclusive MOM<br>- Exclusive PF                                                                                   | BW <1750g, GA <37 weeks       | Until discharge            | Not specified                                                            | 283 (3)            |                                                                                         |
| Fonseca et al. 2017          | Porto Alegre, Brazil  | Retrospective cohort                       | Amount of MOM received by BPD patients vs. non-BPD infants                                             | BPD28                  | MOM + PF in varying amounts, study compares MOM-intake by BPD patients vs. non-BPD patients                         | GA <32 weeks and/or BW <1500g | 6 weeks or discharge       | Bovine fortifier added to MOM                                            | 425 (1)            | BPD was inversely associated with amount of MOM, even after controlling for confounders |
| Furman et al. 2003           | Cleveland, OH, USA    | Prospective cohort                         | Neonatal morbidity, length of hospitalization                                                          | BPD36                  | - Exclusive PF<br>- 1-24 mL/kg/d MOM + PF<br>- 25-49 mL/kg/d MOM + PF<br>- ≥50 mL/kg/d MOM + PF                     | GA <33 weeks, BW <1500g       | 4 weeks                    | Bovine fortifier added to MOM                                            | 119 (1)            | MOM-intake divided over 4 groups by volume of MOM (in mL/kg/d), 0, 1-24, 25-49 and ≥50. |
| Hylander et al. 1998         | USA                   | Retrospective cohort                       | Infection (culture proven sepsis, NEC and/or pneumonia)                                                | BPD?                   | - Any MOM<br>- Exclusive PF                                                                                         | BW <1500g.                    | Until discharge            | Bovine fortifier added to MOM                                            | 212 (1)            |                                                                                         |
| Jacobi-Polishook et al. 2016 | Boston, MA, USA       | Prospective cohort                         | Neurodevelopmental outcome                                                                             | BPD36                  | - Exclusive PF                                                                                                      | GA ≤33 weeks                  | 40 weeks corrected age     | Bovine fortifier added to MOM                                            | 611 (5)            |                                                                                         |

| First author, year         | Location               | Study design                               | Primary outcome(s)                      | Respiratory outcome(s) | Groups                                                                         | Inclusion criteria                | Study duration                             | Fortified                                         | Patients (centers) | Comments                                                                                                                                                               |
|----------------------------|------------------------|--------------------------------------------|-----------------------------------------|------------------------|--------------------------------------------------------------------------------|-----------------------------------|--------------------------------------------|---------------------------------------------------|--------------------|------------------------------------------------------------------------------------------------------------------------------------------------------------------------|
|                            |                        |                                            | (Bailey II) at 18 months                |                        | - MOM + PF, divided into four quartiles based on MOM-intake                    |                                   |                                            |                                                   |                    |                                                                                                                                                                        |
| Maayan-Metzger et al. 2012 | Tel Aviv, Israel       | Retrospective cohort                       | Short-term neonatal outcomes            | BPD28                  | - Only and mainly MOM<br>- Only and mainly PF                                  | GA $\leq$ 32 weeks                | Until discharge                            | Bovine fortifier added to MOM                     | 360 (1)            | Data taken from large prospective, randomized controlled trial, designed to assess possible benefits of supplementing formula with arachidonic and docosahexanoic acid |
| Madore et al. 2017         | Boston, MA, USA        | Retrospective case-control                 | Growth, neurodevelopment                | BPD36                  | - Exclusive MOM;<br>- PF >50%                                                  | BW <1000g                         | First month of life                        | Bovine fortifier added to MOM                     | 81 (1)             |                                                                                                                                                                        |
| O' Connor et al. 2003      | Toronto, Canada        | Retrospective cohort                       | Growth and development outcomes         | BPD28                  | - >80% MOM + PF<br>- $\geq$ 50% MOM + PF<br>- <50% MOM + PF<br>- MOM + >80% PF | GA <33 weeks                      | Until term corrected GA.                   | Bovine fortifier added to MOM                     | 463 (9)            |                                                                                                                                                                        |
| Patra et al. 2017          | Chicago, IL, USA       | Retrospective cohort                       | Neurodevelopmental outcome              | BPD36                  | MOM + PF, split into 5 quintiles based on proportion of MOM as total intake    | GA <35 weeks, BW <1500g           | Until 20 months corrected GA               | Bovine fortifier added to MOM                     | 251 (1)            | Study uses same sample as Patel et al. 2017. We used the data from this article for meta-analysis.                                                                     |
| Schanler et al. 2005       | Houston, TX, USA       | RCT (for our exposure: prospective cohort) | Late onset sepsis and/or NEC            | BPD36                  | - Exclusive MOM<br>- MOM + PF                                                  | GA $\leq$ 29 weeks                | 19 days or discharge                       | Bovine fortifier added to MOM                     | 243 (1)            |                                                                                                                                                                        |
| Sisk et al. 2007           | Winston-Salem, NC, USA | Prospective cohort                         | NEC                                     | BPD36                  | - MOM >50%<br>- PF >50%                                                        | BW 700-1500g                      | Until discharge                            | Bovine fortifier added to MOM                     | 202 (1)            |                                                                                                                                                                        |
| Sisk et al. 2017           | Winston-Salem, NC, USA | Retrospective cohort                       | NEC stage $\geq$ 2                      | BPD36                  | - MOM $\geq$ 50%<br>- DHM $\geq$ 50%<br>- PF $\geq$ 50%                        | GA $\leq$ 32w and BW $\leq$ 1500g | Within 2 hours of birth until 34 weeks PMA | Bovine fortifier added to MOM and to DHM          | 563 (1)            |                                                                                                                                                                        |
| Vohr et al. 2006           | 15 centers, USA        | Prospective cohort                         | Neurodevelopmental outcome at 18 months | BPD36                  | - Any MOM + PF<br>- Exclusive PF                                               | BW $\leq$ 1000g                   | Until discharge                            | Bovine fortifier added to MOM (varied per center) | 1035 (15)          |                                                                                                                                                                        |

BPD28: Defined as supplemental oxygen after day 28 of life. BPD36: Defined as supplemental oxygen at 36 weeks corrected GA. BPD28-36: defined as supplemental oxygen after day 28 of life, or at 36 weeks corrected GA age. BPD?: No definition of bronchopulmonary dysplasia given. MOM: Mother's own milk. PF: Preterm formula. DHM: Donor human milk



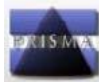

# PRISMA 2009 Checklist

| Section/topic                      | #  | Checklist item                                                                                                                                                                                                                                                                                              | Reported on page # |
|------------------------------------|----|-------------------------------------------------------------------------------------------------------------------------------------------------------------------------------------------------------------------------------------------------------------------------------------------------------------|--------------------|
| <b>TITLE</b>                       |    |                                                                                                                                                                                                                                                                                                             |                    |
| Title                              | 1  | Identify the report as a systematic review, meta-analysis, or both.                                                                                                                                                                                                                                         | 1                  |
| <b>ABSTRACT</b>                    |    |                                                                                                                                                                                                                                                                                                             |                    |
| Structured summary                 | 2  | Provide a structured summary including, as applicable: background; objectives; data sources; study eligibility criteria, participants, and interventions; study appraisal and synthesis methods; results; limitations; conclusions and implications of key findings; systematic review registration number. | 1                  |
| <b>INTRODUCTION</b>                |    |                                                                                                                                                                                                                                                                                                             |                    |
| Rationale                          | 3  | Describe the rationale for the review in the context of what is already known.                                                                                                                                                                                                                              | 2                  |
| Objectives                         | 4  | Provide an explicit statement of questions being addressed with reference to participants, interventions, comparisons, outcomes, and study design (PICOS).                                                                                                                                                  | 2                  |
| <b>METHODS</b>                     |    |                                                                                                                                                                                                                                                                                                             |                    |
| Protocol and registration          | 5  | Indicate if a review protocol exists, if and where it can be accessed (e.g., Web address), and, if available, provide registration information including registration number.                                                                                                                               | 2,3                |
| Eligibility criteria               | 6  | Specify study characteristics (e.g., PICOS, length of follow-up) and report characteristics (e.g., years considered, language, publication status) used as criteria for eligibility, giving rationale.                                                                                                      | 3                  |
| Information sources                | 7  | Describe all information sources (e.g., databases with dates of coverage, contact with study authors to identify additional studies) in the search and date last searched.                                                                                                                                  | 3                  |
| Search                             | 8  | Present full electronic search strategy for at least one database, including any limits used, such that it could be repeated.                                                                                                                                                                               | 3                  |
| Study selection                    | 9  | State the process for selecting studies (i.e., screening, eligibility, included in systematic review, and, if applicable, included in the meta-analysis).                                                                                                                                                   | 3                  |
| Data collection process            | 10 | Describe method of data extraction from reports (e.g., piloted forms, independently, in duplicate) and any processes for obtaining and confirming data from investigators.                                                                                                                                  | 3                  |
| Data items                         | 11 | List and define all variables for which data were sought (e.g., PICOS, funding sources) and any assumptions and simplifications made.                                                                                                                                                                       | 3                  |
| Risk of bias in individual studies | 12 | Describe methods used for assessing risk of bias of individual studies (including specification of whether this was done at the study or outcome level), and how this information is to be used in any data synthesis.                                                                                      | 3                  |
| Summary measures                   | 13 | State the principal summary measures (e.g., risk ratio, difference in means).                                                                                                                                                                                                                               | 4                  |
| Synthesis of results               | 14 | Describe the methods of handling data and combining results of studies, if done, including measures of consistency (e.g., $I^2$ ) for each meta-analysis.                                                                                                                                                   | 4                  |

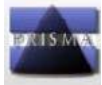

# PRISMA 2009 Checklist

| Section/topic                 | #  | Checklist item                                                                                                                                                                                           | Reported on page #         |
|-------------------------------|----|----------------------------------------------------------------------------------------------------------------------------------------------------------------------------------------------------------|----------------------------|
| Risk of bias across studies   | 15 | Specify any assessment of risk of bias that may affect the cumulative evidence (e.g., publication bias, selective reporting within studies).                                                             | 4                          |
| Additional analyses           | 16 | Describe methods of additional analyses (e.g., sensitivity or subgroup analyses, meta-regression), if done, indicating which were pre-specified.                                                         | 4                          |
| <b>RESULTS</b>                |    |                                                                                                                                                                                                          |                            |
| Study selection               | 17 | Give numbers of studies screened, assessed for eligibility, and included in the review, with reasons for exclusions at each stage, ideally with a flow diagram.                                          | 4                          |
| Study characteristics         | 18 | For each study, present characteristics for which data were extracted (e.g., study size, PICOS, follow-up period) and provide the citations.                                                             | 4, Supplementary Table 1   |
| Risk of bias within studies   | 19 | Present data on risk of bias of each study and, if available, any outcome level assessment (see item 12).                                                                                                | 4                          |
| Results of individual studies | 20 | For all outcomes considered (benefits or harms), present, for each study: (a) simple summary data for each intervention group (b) effect estimates and confidence intervals, ideally with a forest plot. | 4-7                        |
| Synthesis of results          | 21 | Present results of each meta-analysis done, including confidence intervals and measures of consistency.                                                                                                  | 4-7, Supplementary Figures |
| Risk of bias across studies   | 22 | Present results of any assessment of risk of bias across studies (see Item 15).                                                                                                                          | 7                          |
| Additional analysis           | 23 | Give results of additional analyses, if done (e.g., sensitivity or subgroup analyses, meta-regression [see Item 16]).                                                                                    | 4-7                        |
| <b>DISCUSSION</b>             |    |                                                                                                                                                                                                          |                            |
| Summary of evidence           | 24 | Summarize the main findings including the strength of evidence for each main outcome; consider their relevance to key groups (e.g., healthcare providers, users, and policy makers).                     | 7                          |
| Limitations                   | 25 | Discuss limitations at study and outcome level (e.g., risk of bias), and at review-level (e.g., incomplete retrieval of identified research, reporting bias).                                            | 8                          |
| Conclusions                   | 26 | Provide a general interpretation of the results in the context of other evidence, and implications for future research.                                                                                  | 8                          |
| <b>FUNDING</b>                |    |                                                                                                                                                                                                          |                            |
| Funding                       | 27 | Describe sources of funding for the systematic review and other support (e.g., supply of data); role of funders for the systematic review.                                                               | 9                          |

From: Moher D, Liberati A, Tetzlaff J, Altman DG, The PRISMA Group (2009). Preferred Reporting Items for Systematic Reviews and Meta-Analyses: The PRISMA Statement. PLoS Med 6(7): e1000097. doi:10.1371/journal.pmed1000097

For more information, visit: [www.prisma-statement.org](http://www.prisma-statement.org).
